## RETRACTION

# Retraction: Exogenous salicylic acid-induced drought stress tolerance in wheat (*Triticum aestivum* L.) grown under hydroponic culture

The PLOS ONE Editors

The PLOS ONE Editors retract this article [1, 2] because it was identified as one of a series of submissions for which we have concerns about authorship, competing interests, and peer review. We regret that the issues were not addressed prior to the article's publication.

AA, ZA, AR, HMA, MHS, MZMS, and CH did not agree with the retraction. MN, SH, TJ, SA, RS, SA, TS, and MAJ either did not respond directly or could not be reached.

## References

1. Ahmad A, Aslam Z, Naz M, Hussain S, Javed T, Aslam S, et al. (2021) Exogenous salicylic acid-induced drought stress tolerance in wheat (*Triticum aestivum* L.) grown under hydroponic culture. PLoS ONE 16(12): e0260556. <https://doi.org/10.1371/journal.pone.0260556> PMID: 34928959
2. The PLOS ONE Staff (2022) Correction: Exogenous salicylic acid-induced drought stress tolerance in wheat (*Triticum aestivum* L.) grown under hydroponic culture. PLoS ONE 17(6): e0270729. <https://doi.org/10.1371/journal.pone.0270729> PMID: 35749477

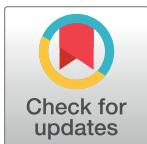

## OPEN ACCESS

**Citation:** The PLOS ONE Editors (2023) Retraction: Exogenous salicylic acid-induced drought stress tolerance in wheat (*Triticum aestivum* L.) grown under hydroponic culture. PLoS ONE 18(4): e0284669. <https://doi.org/10.1371/journal.pone.0284669>

**Published:** April 19, 2023

**Copyright:** © 2023 The PLOS ONE Editors. This is an open access article distributed under the terms of the [Creative Commons Attribution License](https://creativecommons.org/licenses/by/4.0/), which permits unrestricted use, distribution, and reproduction in any medium, provided the original author and source are credited.
